# Supplementary material
Source: publisher figshare collection journal article supplement (https://sage.figshare.com/ndownloader/files/16837265)
Supplement: Supplementary file 1 [file 16837265]

**Table S1**  
**Component Ratings for Strength of Study Design**

| Author                       | Design     | IV  | DV  | IOA | IOA more than 80% | Fidelity | Three attempts | Points per phase | Overall Design Rating |
|------------------------------|------------|-----|-----|-----|-------------------|----------|----------------|------------------|-----------------------|
| Benish & Bramlett (2011)     | MBD        | Yes | Yes | No  | No                | Yes      | Yes            | 3                | Does not meet         |
| Burke et al. (2004)          | ABAB       | Yes | Yes | Yes | Yes               | Yes      | No             | 1                | Does not meet         |
|                              | MBD        | Yes | Yes | Yes | Yes               | Yes      | Yes            | 4                | Meets w/reservations  |
| Chan & O'Reilly (2008)       | Multiprobe | Yes | Yes | Yes | Yes               | Yes      | No             | 3                | Does not meet         |
| Crozier & Tincani (2007)     | ABAB       | Yes | Yes | Yes | Yes               | Yes      | Yes            | 4                | Meets w/reservations  |
|                              | ABCACBC    | Yes | Yes | Yes | Yes               | Yes      | Yes            | 2                | Does not meet         |
|                              | ABAB       | Yes | Yes | Yes | Yes               | Yes      | Yes            | 5                | Meets standards       |
| Hsu et al. (2012)            | MBD        | Yes | Yes | Yes | Yes               | Yes      | Yes            | 3                | Meets w/reservations  |
| Ivey et al. (2004)           | ABAB       | Yes | Yes | Yes | Yes               | Yes      | Yes            | 4                | Meets w/reservations  |
|                              | ABAB       | Yes | Yes | Yes | Yes               | Yes      | Yes            | 4                | Meets w/reservations  |
| Kuoch & Mirenda (2003)       | ABA        | Yes | Yes | Yes | Yes               | Yes      | No             | 5                | Does not meet         |
|                              | ABA        | Yes | Yes | Yes | Yes               | Yes      | No             | 8                | Does not meet         |
| Leaf et al. (2012)           | MBD        | Yes | Yes | Yes | Yes               | Yes      | Yes            | 3                | Meet w/reservations   |
| Lorimer et al. (2002)        | ABAB       | Yes | Yes | Yes | Yes               | No       | Yes            | 3                | Meet w/reservations   |
| Schneider & Goldstein (2010) | MBD        | Yes | Yes | Yes | Yes               | Yes      | Yes            | 9                | Meets standards       |
| Soenksen & Alper (2006)      | MBD        | Yes | Yes | Yes | Yes               | No       | Yes            | 3                | Meets w/reservations  |
| Wright & McCathren (2012)    | MBD        | Yes | Yes | Yes | Yes               | Yes      | Yes            | 5                | Meets standards       |

**Table S2**  
**Component Ratings for Evidence of Experimental Control**

| Author                   | Design      | Stable baseline | Overlapping<br>data | Immediacy | Consistency | Functional<br>Rel. | Evidence<br>Rating |
|--------------------------|-------------|-----------------|---------------------|-----------|-------------|--------------------|--------------------|
| Benish & Bramlett (2011) | MBD         | No              | Yes                 | Yes       | No          | No                 | No evidence        |
|                          | MBD         | No              | Yes                 | Yes       | No          | Yes                | Moderate           |
|                          | MBD         | No              | Yes                 | Yes       | No          | Yes                | Moderate           |
| Burke et al. (2004)      | ABAB        | No              | Yes                 | No        | No          | No                 | No evidence        |
|                          | MBD         | No              | Yes                 | Yes       | Yes         | Yes                | Moderate           |
| Chan & O'Reilly (2008)   | Multi-probe | No              | Yes                 | Yes       | Yes         | No                 | No evidence        |
| Crozier & Tincani (2007) | ABAB        | No              | Yes                 | Yes       | Yes         | Yes                | Moderate           |
|                          | ABCACBC     | Yes             | Yes                 | Yes       | Yes         | No                 | No evidence        |
|                          | ABAB        | Yes             | Yes                 | Yes       | Yes         | Yes                | Moderate           |
|                          | ABAB        | No              | Yes                 | No        | No          | No                 | No evidence        |
| Hsu et al. (2012)        | MBD         | No              | Yes                 | No        | No          | No                 | No evidence        |
| Ivey et al. (2004)       | ABAB        | No              | Yes                 | No        | No          | No                 | No evidence        |
|                          | ABAB        | No              | Yes                 | No        | No          | No                 | No evidence        |
| Kuoch & Mirenda (2003)   | ABA         | No              | Yes                 | Yes       | No          | No                 | No evidence        |
|                          | ABA         | No              | Yes                 | Yes       | No          | No                 | No evidence        |

|                                 |                   |     |     |     |     |     |             |
|---------------------------------|-------------------|-----|-----|-----|-----|-----|-------------|
| Leaf et al. (2012)              | MBD – Fig.<br>2-4 | Yes | Yes | No  | No  | No  | No evidence |
| Lorimer et al. (2002)           | ABAB              | No  | Yes | Yes | Yes | Yes | Moderate    |
|                                 | ABAB              | No  | Yes | Yes | Yes | Yes | Moderate    |
| Schneider & Goldstein<br>(2010) | MBD               | No  | Yes | Yes | Yes | Yes | Moderate    |
| Soenksen & Alper (2006)         | MBD               | Yes | Yes | Yes | Yes | Yes | Moderate    |
|                                 | MBD               | Yes | Yes | Yes | Yes | Yes | Moderate    |
| Wright & McCathren<br>(2012)    | MBD               | Yes | Yes | No  | No  | No  | No evidence |
|                                 | MBD               | No  | Yes | No  | No  | No  | No evidence |

**Table S3**  
**Meta-regression of Log Response Ratio-increasing effect size estimates**

| Predictor                            | Coefficient   |               |
|--------------------------------------|---------------|---------------|
|                                      | Estimate (SE) | 95% CI        |
| Challenging behavior (average LRRi)  | 1.02 (0.22)   | [-0.11, 2.15] |
| Pro-social behavior (average LRRi)   | 0.83 (0.51)   | [-1.11, 2.77] |
| <i>WWC design rating<sup>a</sup></i> |               |               |

|                                                                      |              |               |
|----------------------------------------------------------------------|--------------|---------------|
| Meets standards with reservations                                    | 0.01 (0.51)  | [-1.37, 1.38] |
| Does not meet standards                                              | 0.35 (0.55)  | [-1.14, 1.85] |
| <b><i>Participant age in years<sup>b</sup></i></b>                   |              |               |
| Six or older                                                         | -0.11 (0.56) | [-2.05, 1.84] |
| <b><i>Participant diagnosis<sup>c</sup></i></b>                      |              |               |
| No diagnosed disability                                              | 0.18 (0.39)  | [-0.91, 1.26] |
| <b><i>Interventionist and primary data collector<sup>d</sup></i></b> |              |               |
| Same                                                                 | 0.14 (0.32)  | [-0.66, 0.94] |

---

Notes:

<sup>a</sup> Reference category is meets standards without reservations.

<sup>b</sup> Reference category is five or younger.

<sup>c</sup> Reference category is diagnosed disability.

<sup>d</sup> Reference category is Interventionist was not the primary data collector.

**Additional discussion of Table S3**

Table S3 reports the results of a joint meta-regression, controlling for additive effects of each of the four potential moderators while also differentiating between challenging behavior and prosocial behavior outcomes. After controlling for all four moderators, the average LRRi effect sizes for challenging behavior and prosocial behavior were reduced and were imprecisely estimated, so that they were not statistically distinguishable from null. The average LRRi estimate for challenging behavior was 1.02, corresponding to an average change of -64%, 95% CI [-88%, +11%]. The average LRRi estimate for pro-social behavior was 0.83, corresponding to an average improvement of 129%, 95% [-67%, 1487%]. Coefficients of the potential moderators were all imprecisely estimated.
